# Supplementary material
Source: publisher site journal article supplement (https://www.dovepress.com/article/500892)
Supplement: Supplementary file 1 [file get_supplementary_file.php]

**
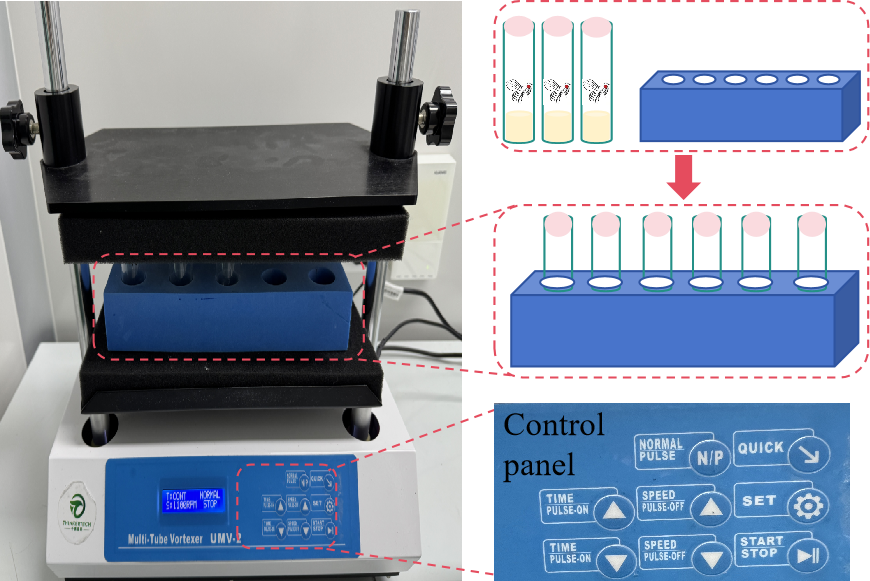
**

**Supplementary Fig 1. Mechanical CSD apparatus and the experimental procedure.**

**
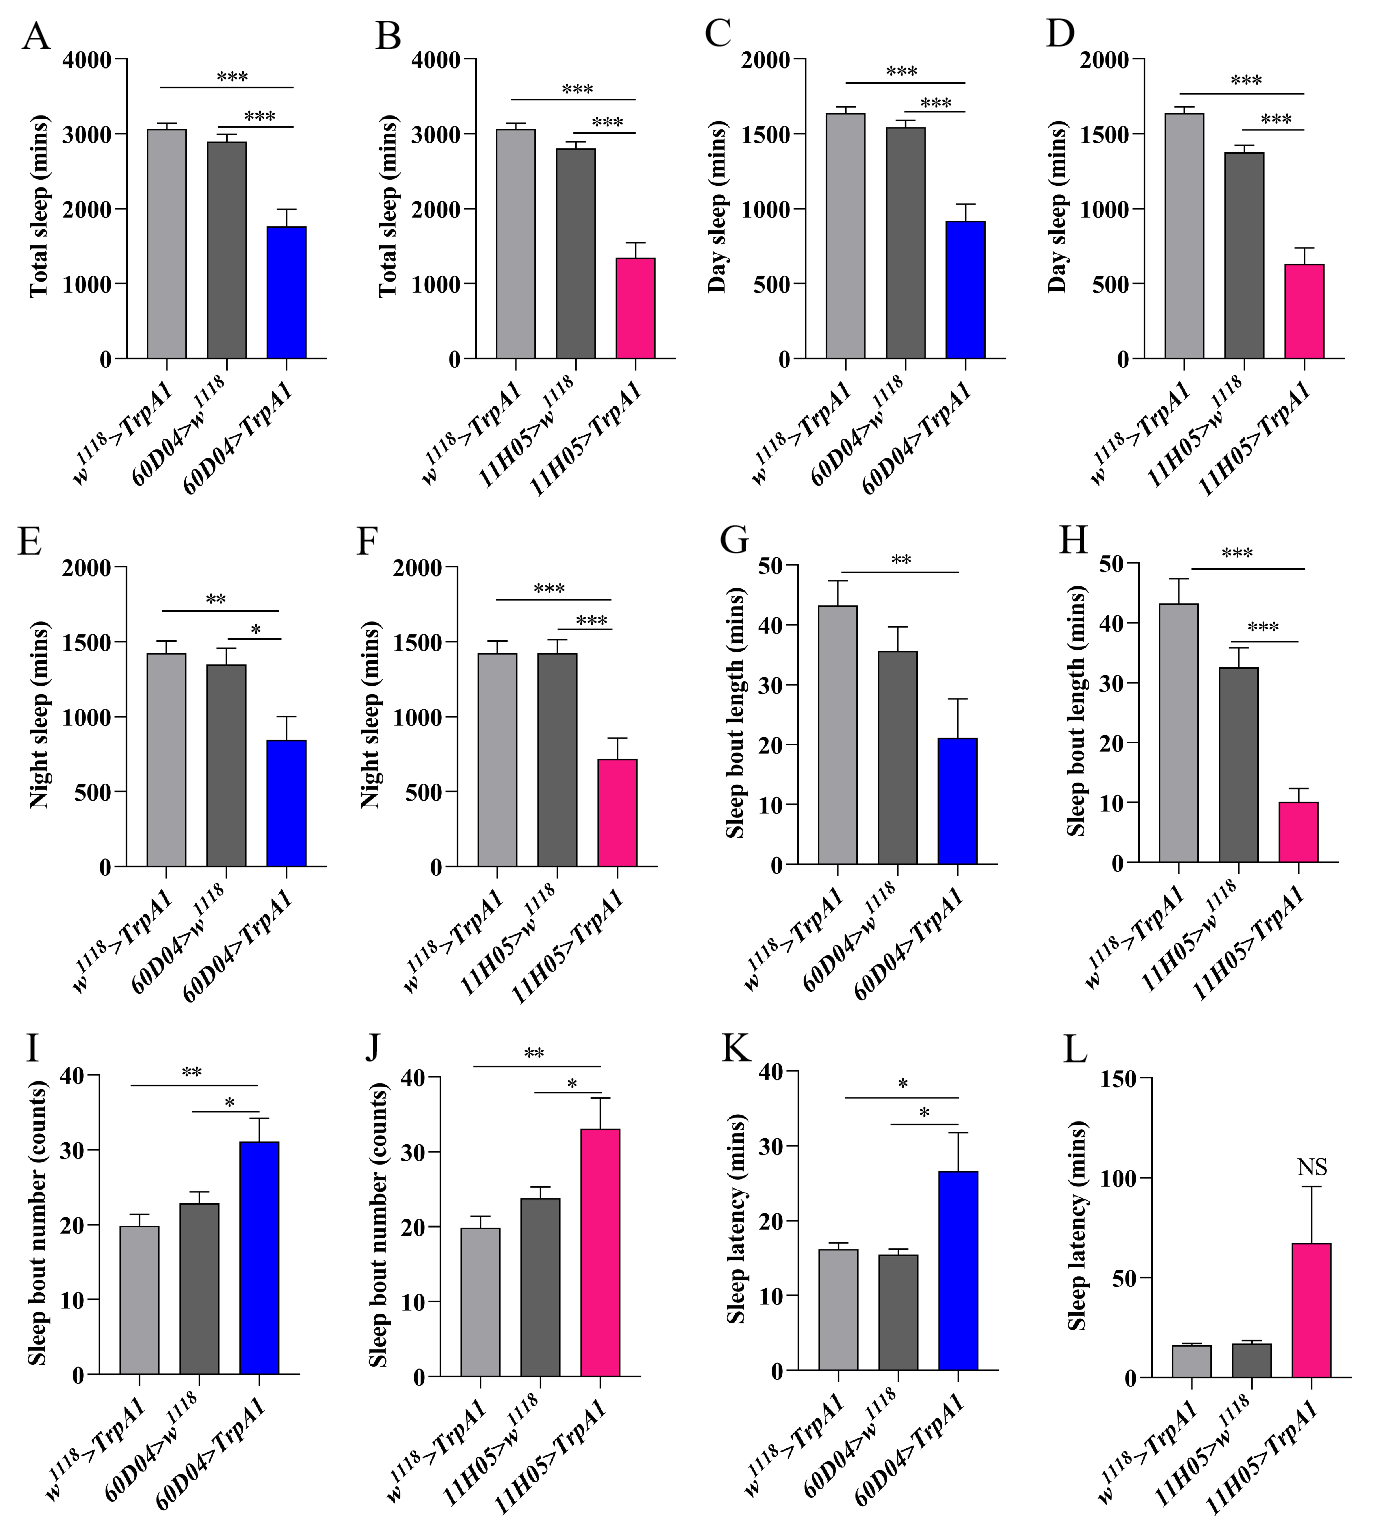
**

**Supplementary Fig 2.** Sleep is severely impaired in thermogenetic CSD flies. (A and B) Total sleep throughout the 72h cycle (n=15-21). (C-F) Daytime and nighttime sleep times in flies (n=15-21). (G and H) Sleep bout length in flies (n=15-21). (I and J) Sleep bout number of flies (n=15-21). (K and L) Sleep latency in flies (n=15-21). Data are presented as means±S.E.M. **p*< 0.05, ***p*< 0.01, ****p*< 0.001.

**
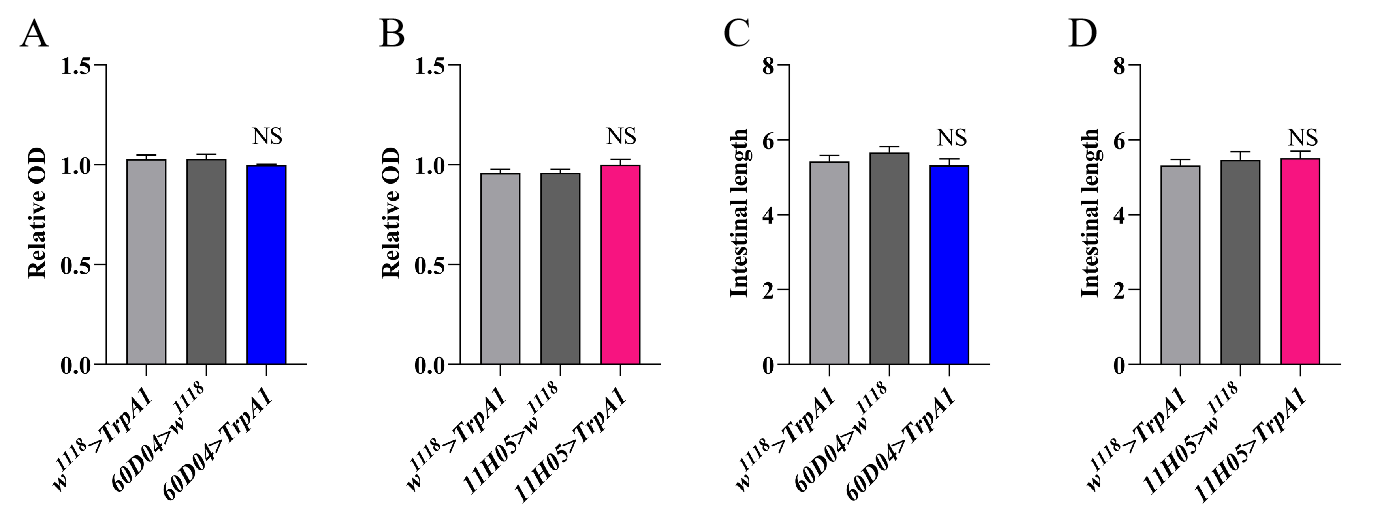
**

**Supplementary Fig 3.** Thermogenetic CSD causes a decrease in intestinal function in flies. (A and B) Quantification of fly excretions from the flies fed with Bromophenol Blue. Mean and SEM. (C and D) Relative length of the intestines of CSD flies compared to control flies.
